# Supplementary material
Source: PubMed Central journal article supplement (PMC11198981)
Supplement: NIHMS1953082-supplement-Supplementary_information.pdf [file NIHMS1953082-supplement-Supplementary_information.pdf]

1 Supplemental Information:

2

3 **A Novel Combination Treatment for Melanoma: FLASH Radiotherapy and**  
4 **Immunotherapy Delivered by a Radiopaque and Radiation Responsive**  
5 **Hydrogel**

6

7 Yuxi C. Dong,<sup>a,b</sup> Lenitza M. Nieves,<sup>c</sup> Jessica C. Hsu,<sup>a,b</sup> Ananyaa Kumar,<sup>b</sup> Mathilde Bouché,<sup>d</sup> Uma  
8 Krishnan,<sup>e</sup> Katherine J. Mossburg,<sup>a,b</sup> Deeksha Saxena,<sup>e</sup> Selen Uman,<sup>b</sup> Taku Kambayashi,<sup>f</sup> Jason A.  
9 Burdick,<sup>b,g</sup> Michele M. Kim,<sup>e</sup> Jay F. Dorsey,<sup>e\*</sup> and David P. Cormode<sup>a,b\*</sup>

10

11 <sup>a</sup> *Department of Radiology, University of Pennsylvania, Philadelphia, PA, USA*

12 <sup>b</sup> *Department of Bioengineering, University of Pennsylvania, Philadelphia, PA, USA*

13 <sup>c</sup> *Department of Biochemistry and Molecular Biophysics, Perelman School of Medicine of the University*  
14 *of Pennsylvania, Philadelphia, PA, USA*

15 <sup>d</sup> *Université de Lorraine, CNRS, L2CM UMR 7053, F-54000 Nancy, France*

16 <sup>e</sup> *Department of Radiation Oncology, University of Pennsylvania, Philadelphia, PA, USA*

17 <sup>f</sup> *Department of Pathology and Laboratory Medicine, University of Pennsylvania, Philadelphia, PA, USA*

18 <sup>g</sup> *Department of Chemical and Biological Engineering, University of Colorado Boulder, Boulder, CO, USA*

19

20

21

22 **Author information**

23 \* Corresponding Authors

24 Contact information: 3400 Spruce St, 1 Silverstein, Philadelphia, PA, 19104, USA

25 E-mail: David.Cormode@penncmedicine.upenn.edu (D. P. C.)

26

## 27 **1. Supplementary Materials and Methods**

28 **1.1. Materials.** Gold (III) chloride trihydrate (99.9%), sodium borohydride powder (98.0%), poly(bis(4-  
29 carboxyphenoxy)phosphazene) disodium salt (PCPP, 1 MDa), L-glutathione reduced (GSH),  
30 selenocystamine dihydrochloride and hexamethylenediamine were purchased from Sigma-Aldrich  
31 (St.Louis, MI). Imiquimod (IMQ) was purchased from Selleck Chemicals (Houston, TX). B16-F10 cell line  
32 was purchased from ATCC (Manassas, VA). Cells were cultured in Dubecco's Modified Eagle Medium  
33 (DMEM) supplemented with 10% fetal bovine serum (FBS) and 1% penicillin (10000 units/mL) from Life  
34 Technologies Invitrogen (Grand Island, NY). Mouse TNF alpha and IL-6 ELISA kits were purchased from  
35 Abcam (Cambridge, UK). C57BL/6J mice were obtained by The Jackson Laboratory (Bar Harbor, ME).  
36 Milli-Q deionized (DI) water (18.2 MΩ cm) was used throughout the experiments.

37

38 **1.2. Synthesis of GSH-Coated AuNP.** Ultrasmall GSH-coated AuNP were synthesized by a slight  
39 modification of the Turkevich method that our group has previously reported.<sup>1</sup> Briefly, a 2 mL freshly  
40 prepared sodium borohydride solution (5 mg mL<sup>-1</sup>) was slowly added dropwise to 100 mL of DI water  
41 containing 16 mg of gold chloride under stirring (350 rpm). The color of the mixture changed from pale-  
42 yellow to black, then to wine-red after adding sodium borohydride. After 20 minutes stirring at room  
43 temperature, 1 mL of capping ligand GSH (5 mg mL<sup>-1</sup>) was prepared in DI water and was quickly added  
44 to the mixture. The resulting mixture was incubated at 4 °C overnight. The nanoparticle solution was  
45 purified by centrifugation in 10 kDa molecular weight cut off (MWCO) filtration tubes (Sartorius Stedim  
46 Biotech, Germany). The tubes were spun at 4000 rpm for 5 minutes and rinsed twice with DI water. After  
47 the last wash, the nanoparticles were concentrated to a final volume of 1 mL and filtered through a 0.22  
48 μm filter and stored at 4 °C for use in subsequent experiments. The final nanoparticle solution was  
49 suspended in PBS for future studies. Inductively coupled plasma optical emission spectroscopy (ICP-  
50 OES) was performed to determine the final concentration of the stock AuNP solution.

51

## 52 **1.3. Hydrogel Characterization**

53

54 **1.3.1. Electron Microscopies.** For TEM, hydrogels were fixed with 2% paraformaldehyde and 2.5%  
55 glutaraldehyde. The embedded samples were then cut into sections in 60 nm thickness and mounted  
56 onto Formvar carbon-coated copper grids with 200 mesh (Electron Microscopy Sciences, Hatfield, PA).  
57 TEM micrographs were acquired using a JEOL 1010 microscopy (JEOL, Tokyo, Japan) with an  
58 acceleration voltage of 80 kV. SEM was done as previously reported.<sup>2</sup>

59

60 **1.3.2. ICP-OES.** The elemental gold concentrations in the hydrogels were determined using ICP-OES  
61 (Spectro Genesis, Germany). 10  $\mu$ L of hydrogel stock were placed in 15 mL conical tubes. The hydrogels  
62 were dissolved in 1 mL of aqua regia (200  $\mu$ L of nitric acid, 600  $\mu$ L of HCl and 200  $\mu$ L of DI water) followed  
63 by dilution with 9 mL of DI water. The final gold concentrations were determined by multiplying the  
64 concentrations obtained by the ICP-OES by their dilution factor.

65

66 **1.3.3. Energy Dispersive X-ray Spectroscopy (EDX).** 10  $\mu$ L of diluted hydrogel sample was dried onto  
67 Formvar carbon-coated copper grids with 200 mesh. The samples were then imaged using a FEI Quanta  
68 600 field emission gun scanning electron microscope (FEI, Hillsboro, OR) equipped with EDX detectors  
69 at 15 kV.

70

71 **1.3.4. X-ray Powder Diffraction (XRD).** The XRD patterns of dried hydrogel samples were recorded  
72 using a GiegerFlex D/Max-B X-ray diffractometer (Rigaku, Tokyo, Japan) at 45 kV and 30 mA with a  
73 monochromatized Cu Ka radiation wavelength of 1.5406 Å. A scan range of 20-60° and scan rate of 2°  
74 per minute were used.

75

76 **1.3.5. Fourier Transform Infrared (FT-IR) Spectroscopy.** The infrared spectra of hydrogel samples  
77 were collected using a JASCO FT/IR-480 Plus spectrophotometer (JASCO, Maryland, USA). The  
78 samples were prepared by grinding 5  $\mu$ L diluted selenocystamine solution (5 mg mL<sup>-1</sup>), PCPP solution (1  
79 mg mL<sup>-1</sup>), or hydrogel samples with 100 mg of dried potassium bromide (KBr) powder and pressing them  
80 into compact pellets.

81

82 **1.3.6. Rheology.** The hydrogel samples were vortexed for 30 seconds and sonicated for 30 minutes in  
83 an ultrasound water bath. Then, the hydrogels were loaded onto the Peltier plate on a rheometer (AR  
84 2000 EX, TA Instruments, New Castle, DE). A parallel plate geometry with a gap size of 100  $\mu\text{m}$  was  
85 used. The following measuring conditions were used for the measurements: frequency sweep (0.001-  
86 500% strain, 10 Hz), continuous flow (shear rates from 0 to 50  $\text{s}^{-1}$  over 2 minutes 30 seconds), and cyclic  
87 strain (low = 0.2% strain, high = 500% strain, 10 Hz). The measurements were carried out at 25  $^{\circ}\text{C}$ .

88

89 **1.3.7. Hydrogel Irradiation.** The photon irradiation was performed on an X-RAD 320ix irradiator (PXi,  
90 North Brandford, CT) operated at 320 kV and 12.5 mA. An aluminum filter of 2 mm was used to deliver  
91 the radiation dosage at a rate of 2.65 Gy/min. The proton irradiation was performed using an IBA Proteus  
92 One C230 Cyclotron (Louvain-LA-Neuve, Belgium) and was used to deliver a 230 MeV proton beam at  
93 either a conventional dose rate (0.5 Gy/s) or FLASH ultrafast dose rate (95-103 Gy/s). A field size of 26  
94 mm in diameter was used at the point of irradiation. Gafchromic EBT3 film was used to verify the flatness  
95 and shape relative dose profiles. NIST-traceable calibrated Advanced Markus Chamber was used to  
96 confirm the output dose prior to every experiment.

97

98 **1.4. AuNP and IMQ Release.**

99 **1.4.1. Effect of Radiation on AuNP and IMQ Release.** Release studies were performed to determine  
100 the percentage cumulative release of AuNP and IMQ drug over time. Hydrogels loaded with AuNP ( $[\text{Au}]$   
101 = 0.2  $\text{mg mL}^{-1}$ ) and drug ( $[\text{IMQ}]$  = 0.2  $\text{mg mL}^{-1}$ ) were prepared as described above. Then, hydrogels were  
102 suspended into 1 mL of freshly prepared release media comprising of PBS and 10% of FBS in micro-  
103 centrifuge tubes. The hydrogels were centrifuged at 4,000 rpm for 8 minutes. Samples were prepared in  
104 triplicate for each radiation dose treatment and irradiated with the desired radiation dose (e.g., 15, 30, 45  
105 and 60 Gy) using a radiotherapy at conventional dose rate (CONV-RT) or FLASH-RT. Following that,  
106 samples were incubated at 37  $^{\circ}\text{C}$  in a water bath for the overall experiment time. At the desired time  
107 points (1, 4, 7 days post-irradiation), samples were vortexed and centrifuged at 4,000 rpm for 8 minutes.

108 The supernatants were gently collected for quantification of the released AuNP by ICP-OES and the  
109 released IMQ by UV-vis spectroscopy. 1 mL of freshly prepared release media was added to each sample,  
110 and the samples were incubated at 37 °C in a water bath until the next study time point.

111

112 **1.4.2. Effect of Oxygen and Radical Oxygen Species (ROS) Scavenging on AuNP Release.** The  
113 effect of radiation on the AuNP hydrogel in conditions preventing ROS formation was investigated by  
114 performing release studies in degassed medium or in the presence of ROS scavengers. AuNP hydrogels  
115 were prepared as described above. To degas the release media, a continuous nitrogen flow was added  
116 to freshly prepared medium comprising of PBS and 10% of FBS in a single neck flask for 30 minutes. To  
117 scavenge ROS production, 1 mg of ascorbic acid was added per 1 mL prepared release media. The  
118 hydrogels were then suspended into 1 mL of degassed or ascorbic acid supplemented medium. The  
119 hydrogels were centrifuged at 4,000 rpm for 8 minutes and irradiated with FLASH-RT at 0 Gy (mock  
120 irradiation) or 60 Gy. Following the irradiation, samples were incubated at 37 °C in a water bath. The  
121 supernatants were gently collected for quantification of the released AuNP at desired time points (1, 3, 7  
122 days post-irradiation).

123

124 **1.5. CT Phantom Imaging.** The inherent X-ray contrast generation of hydrogels and degraded  
125 hydrogels upon hydrolysis and FLASH-RT were examined. Samples were scanned using a MILabs  
126 microCT (MILabs, Utrecht, The Netherlands) system before and after FLASH-RT. In brief, hydrogels with  
127 gold concentrations from 0 to 10 mg mL<sup>-1</sup> were prepared in 200 µL micro-centrifuge tubes in triplicates.  
128 Samples received 60 Gy FLASH-RT and were incubated at 37 °C in a water bath for 7 days. On day 7,  
129 hydrogels were vortexed and reformed by centrifuging at 4,000 rpm for 8 minutes. The supernatants were  
130 discarded, and the hydrogels were resuspended in DI water. Samples were then scanned with MILabs  
131 microCT at a tube voltage of 55 kV and a tube current of 190 µA with exposure time of 75 ms. Slices of  
132 100 µm thickness with an increment of 0.1 mm were reconstructed using the algorithm provided by the  
133 manufacturer. Image analyses were performed using OsirixX (v.3.7.1 64-bit software). A circular ROI was

134 drawn on the coronal view of each tube. The CT attenuation value for each sample tube at each  
135 concentration was recorded as the average of three samples of that same concentration.

136

## 137 **1.6. Cell Culture**

138 **1.6.1. Biocompatibility of Non-Drug Loaded AuNP Hydrogels.** Cells were seeded in 35 mm dishes  
139 with 20 mm bottom wells at a density of 8,000 cells per well. Meanwhile, the AuNP hydrogel ( $[Au] = 8 \text{ mg}$   
140  $\text{mL}^{-1}$ ) was incubated in cell medium at 37 °C for 24 hours. The supernatants were collected as described  
141 above and used to treat the cells for 8 hours. Once the treatment was done, the LIVE/DEAD assay  
142 (Invitrogen Life Technologies, Grand Island, NY) was performed. In brief, the cells were rinsed with DPBS  
143 twice, and 400  $\mu\text{L}$  of a solution containing 0.025% live cell dye calcein-AM and 0.1% dead cell dye  
144 ethidium-1 homodimer in DPBS was added to the cells. Cells were incubated with this dye solution for  
145 20 minutes. The cells were then imaged with a Nikon Eclipse Ti-U fluorescence microscope with FITC  
146 (ex: 495, em: 519 nm) and Texas Red (ex: 595, em: 613 nm) filters to image live and dead cells,  
147 respectively. Four different areas of each well were imaged. The number of live and dead cells was  
148 measured using a custom MATLAB (Mathworks, Natick, MA) code. The percentage viability was  
149 determined by calculating the ratio of live to dead cells normalized to control.

150

151 **1.6.2. Effect of Free IMQ Treatment.** An MTS assay was performed to assess the cytotoxicity of the  
152 free IMQ on B16-F10 cells. Cells were seeded in three 96-well plates at a density of 5,000 cells per well  
153 and incubated at 37 °C and 5%  $\text{CO}_2$  for 24 hours. Following the incubation period, IMQ was prepared in  
154 DMSO at concentrations of 0 (control), 20, 50, 100 and 200  $\mu\text{g mL}^{-1}$ . Cells were treated for 24, 48 or 72  
155 hours. Once the treatment was done for each group, the cells were washed with DPBS and incubated  
156 with the MTS assay solution (Promega, Madison, WI) comprised of 20  $\mu\text{L}$  of stock MTS solution and 100  
157  $\mu\text{L}$  of cell medium. After the 2-hour incubation period, a microplate reader (Synergy H1, BioTek, VT) was  
158 used to record the absorbance at 490 nm. The cell viability relative to control (%) for each concentration  
159 and treatment duration was determined.

160

161 **1.7. Ex Vivo Studies.**

162 **1.7.1. Biodistribution.** At 18 days post-treatment, mice were euthanized with CO<sub>2</sub>, followed by cervical  
163 dislocation to analyze the biodistribution of released AuNP. Blood samples, and major organs (i.e., heart,  
164 lungs, liver, spleen, and kidneys) from each AuNP hydrogel-treated mouse were harvested and digested  
165 by 1 mL of nitric acid overnight at 75 °C followed by 2 more hours of 250 μL of HCl at 75 °C. The samples  
166 were then diluted to a final volume of 10 mL with DI water. The concentrations of gold in the digested  
167 samples were measured by ICP-OES.

168

169 **1.7.2. Histology.** The organs of interests and tumors from the following groups: 1) DPBS control, 3)  
170 AuNP-gel + FLASH-RT and 5) AuNP-IMQ-gel + FLASH-RT, were harvested. The organs and tumors  
171 were rinsed with chilled DPBS and then cut into 5-6 mm thick pieces. Samples were immediately  
172 transferred to 10% buffered formalin solution and stored at 4 °C overnight for fixation. The samples were  
173 dehydrated, embedded, sectioned, and stained with hematoxylin end eosin (H&E) by the Children's  
174 Hospital of Philadelphia Pathology (CHOP) core. The slides were analyzed with a slide scanner Aperio  
175 CS-O (Leica Biosystems).

176

177

178 **2. Supplementary Results**

179

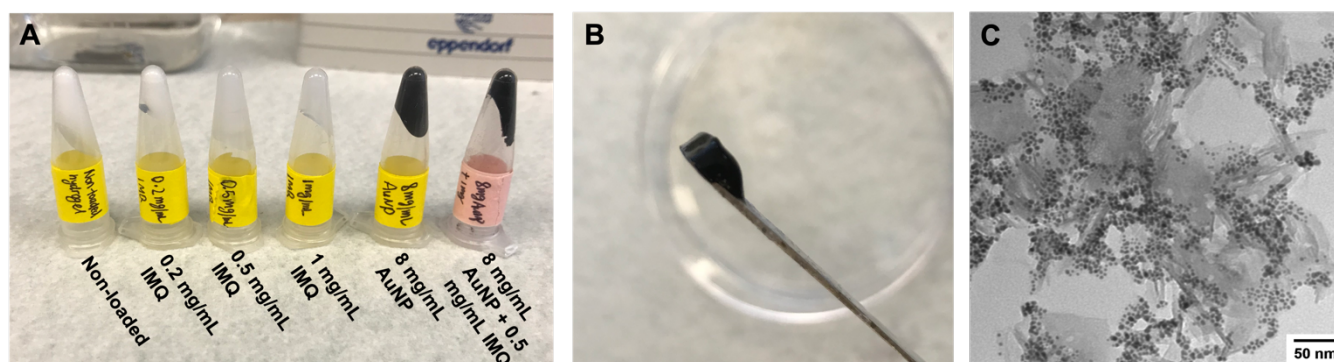

180 **Figure S1. (A)** Photographs of hydrogels nonloaded, loaded with IMQ in different concentrations, loaded  
181 with AuNP, or loaded with both AuNP and IMQ. **(B)** Photograph of IMQ-AuNP hydrogel on a spatula. **(C)**  
182 Representative TEM micrograph of AuNP-IMQ hydrogel in dry state. Scale bar = 50 nm.

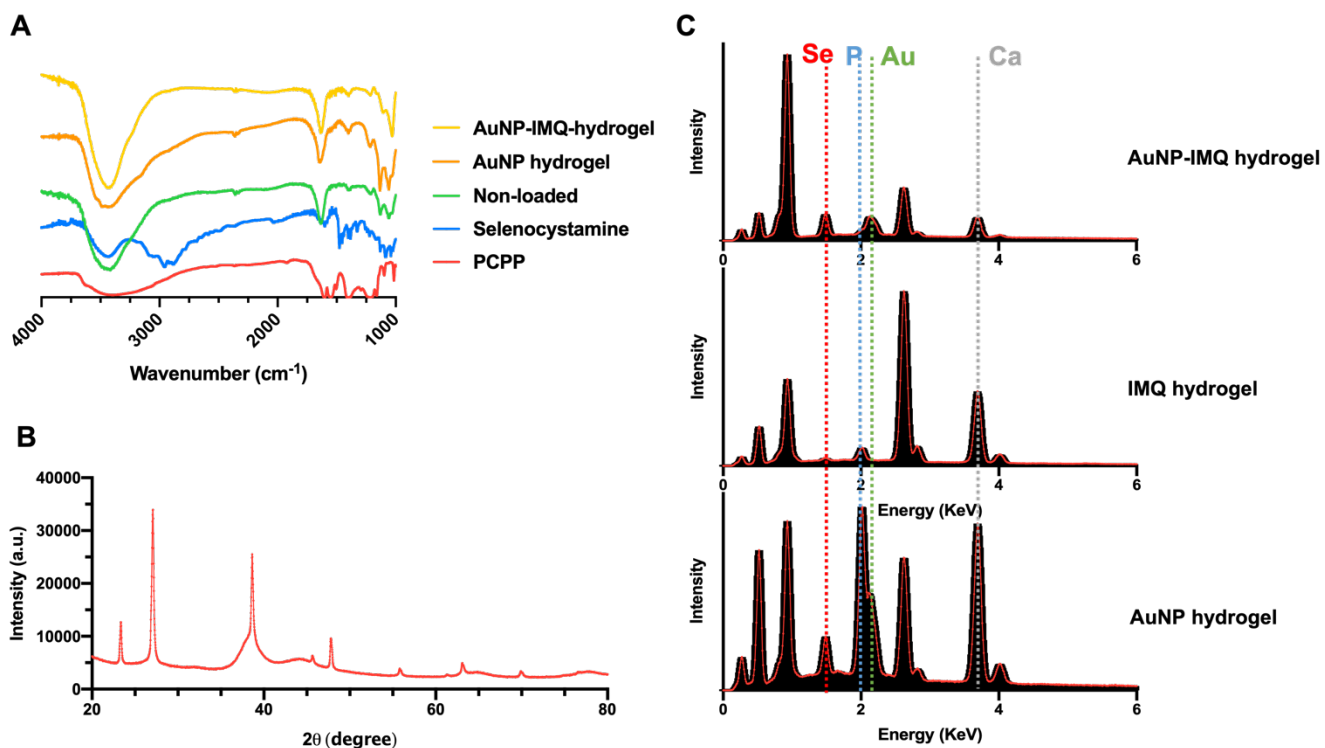

184

185 **Figure S2.** Characterization of AuNP-IMQ hydrogel. **(A)** FT-IR spectra of AuNP-IMQ loaded, AuNP  
 186 loaded and non-loaded hydrogels in comparison to free selenocystamine and PCPP. **(B)** XRD spectrum  
 187 of AuNP-IMQ hydrogel. **(C)** EDX spectra of AuNP-IMQ, IMQ, and AuNP hydrogels.

188

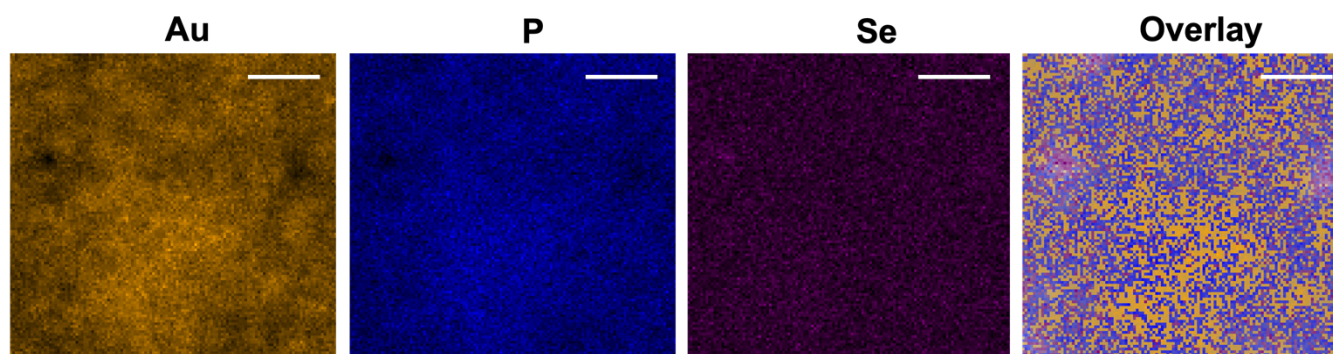

189

190 **Figure S3.** Elemental mapping of AuNP-IMQ hydrogels. All scale bars are 20  $\mu\text{m}$ .



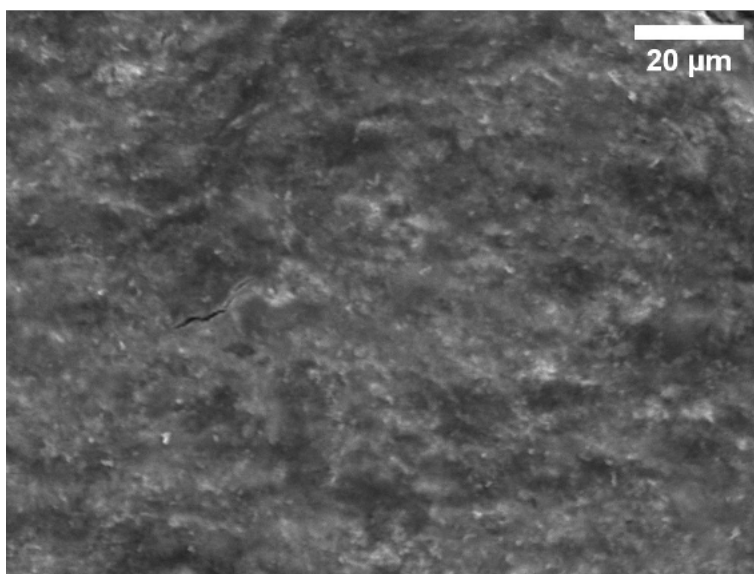

191

192 **Figure S4.** Scanning electron microscopy of the hydrogel.

193

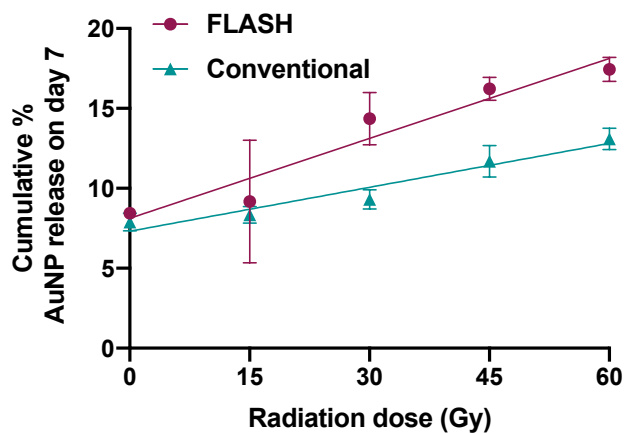

194

195 **Figure S5.** Quantification of the released gold from the hydrogel irradiated with FLASH-RT or CONV-RT  
 196 at a range of radiation doses.

197

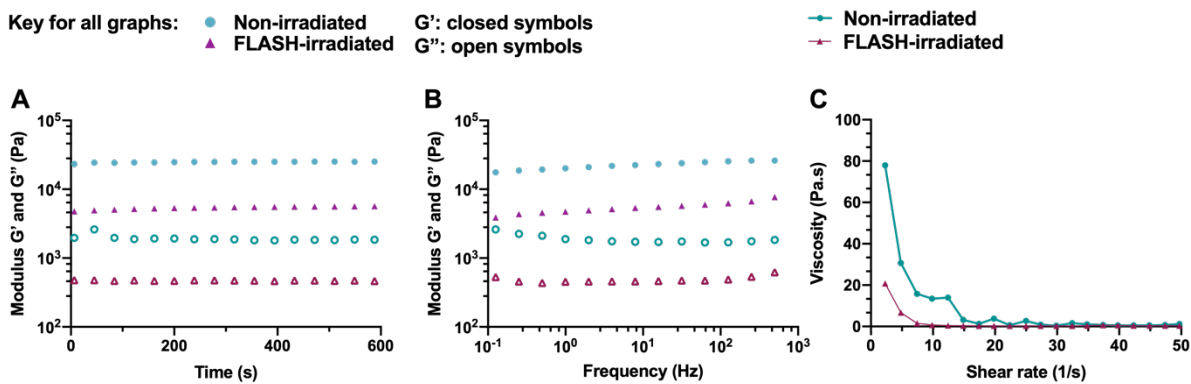

198

199 **Figure S6.** Rheological characterization of AuNP-IMQ-gel. Non-irradiated or FLASH-irradiated hydrogels  
 200 characterized using oscillatory shear rheometry, including: storage ( $G'$ , closed symbols) and loss ( $G''$ ,  
 201 open symbols) moduli **A)** over time at 0.2% strain and 10 Hz, **B)** across a range of frequencies at 0.2%  
 202 strain and **C)** viscosity with increasing shear rate.

203

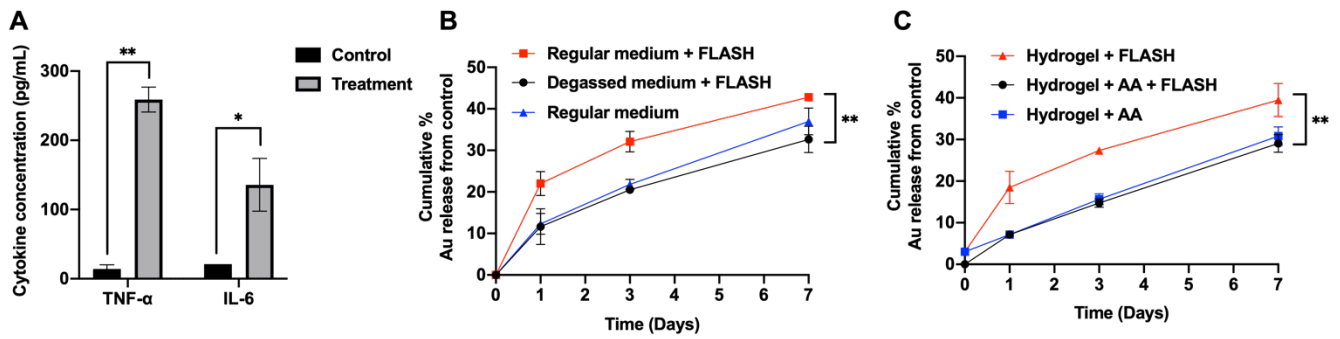

204

205 **Figure S7. A)** ELISA quantification of cytokine secretion of TNF- $\alpha$  and IL-6 in the splenocyte  
 206 supernatants with treatment of FLASH-RT triggered IMQ release. Quantification of cumulative gold  
 207 release from the hydrogel after FLASH-RT with either 0 Gy or 60 Gy in **B)** a regular or degassed medium  
 208 and **C)** a regular or ROS scavenging medium.

209

210

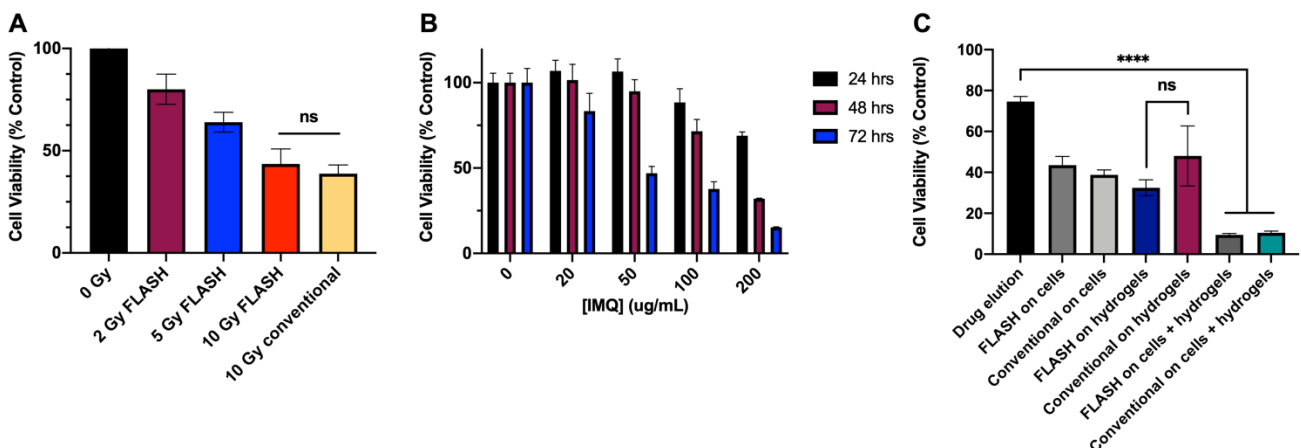

211

212 **Figure S8. Viability of B16-F10 cells A)** at 48 hours after receiving radiotherapies in a range of radiation  
 213 doses. **B)** at 24, 48 or 72 hours after receiving free IMQ treatment in a range of concentrations. **C)** at 48  
 214 hours after receiving different treatments.

215

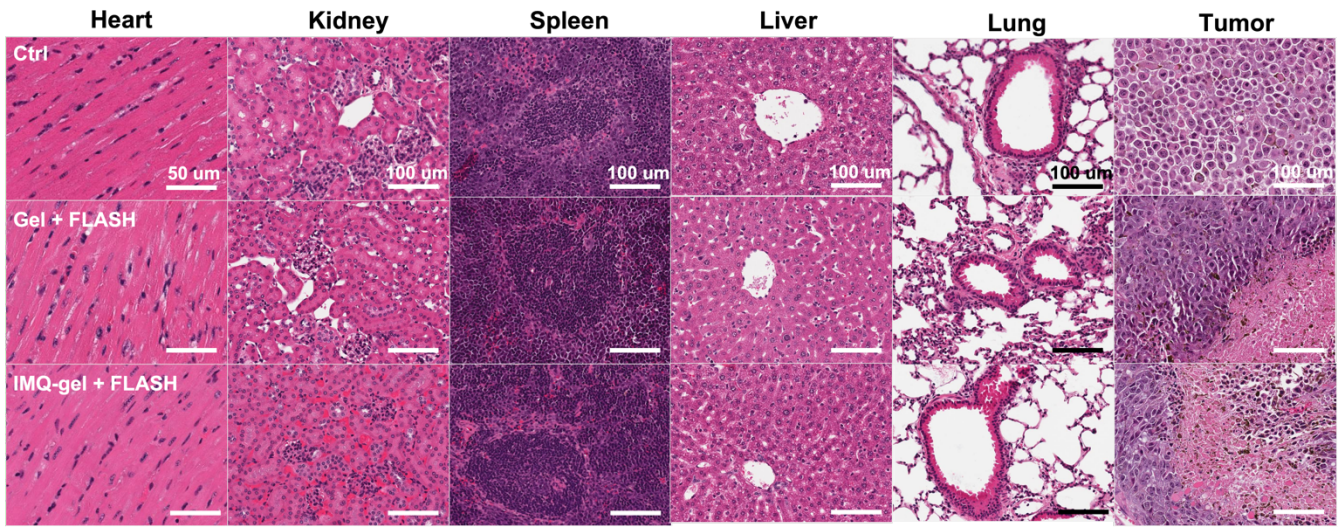

216

217 **Figure S9.** Representative micrographs of tissue from major organs and tumors, after H&E staining, of  
218 mice injected with DPBS (top row), treated with AuNP-gel + FLASH-RT (middle row), and AuNP-IMQ-gel  
219 + FLASH-RT (bottom row).

220

221

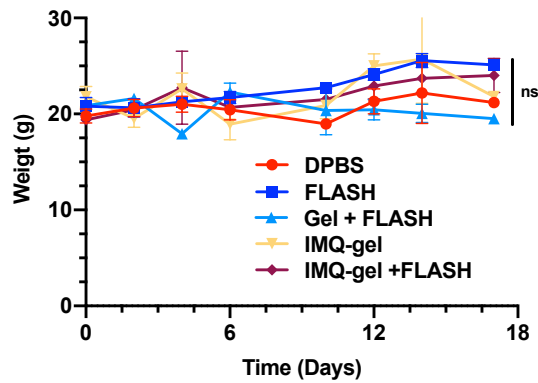

222

223 **Figure S10.** Body weight of control mice (injected with DPBS) and treated mice over 18 days.

224

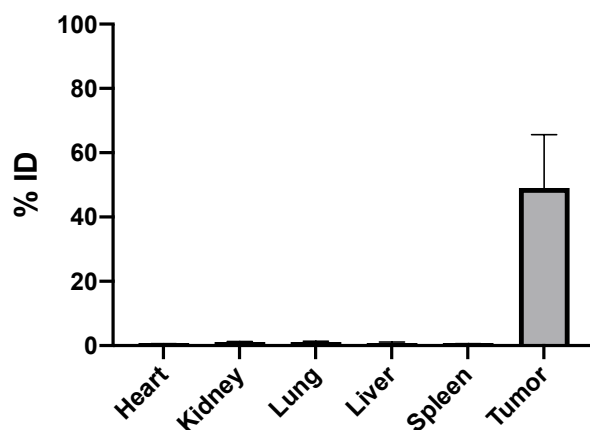

225

226 **Figure S11.** Biodistribution of AuNP.

227

228

229

### 230 **References**

231 (1) Cheheltani, R.; Ezzibdeh, R. M.; Chhour, P.; Pulaparathi, K.; Kim, J.; Jurcova, M.; Hsu, J. C.; Blundell,  
 232 C.; Litt, H. I.; Ferrari, V. A.; et al. Tunable, biodegradable gold nanoparticles as contrast agents for  
 233 computed tomography and photoacoustic imaging. *Biomaterials* **2016**, *102*, 87-97. DOI:  
 234 <https://doi.org/10.1016/j.biomaterials.2016.06.015>.

235 (2) Bouche, M.; Dong, Y. C.; Sheikh, S.; Taing, K.; Saxena, D.; Hsu, J. C.; Chen, M. H.; Salinas, R. D.;  
 236 Song, H.; Burdick, J. A.; et al. A novel treatment for glioblastoma delivered by a radiation responsive and  
 237 radiopaque hydrogel. *ACS Biomater. Sci. Eng.* **2021**, *7* (7), 3209-3320.

238
